# Supplementary material
Source: Springer Nature journal article supplement (https://www.springermedizin.de/resource/supplementary/13058_2013_3583_MOESM10_ESM.pdf/9703864)
Supplement: MOESM10 [file 9703864]

Supplemental Table 6. Tumor qPCR Ingenuity Pathway Analysis

1) Significant Gene List (15):

|        |            |
|--------|------------|
| APAF1  | INHA       |
| BMP10  | KRT18      |
| BMP7   | KRT8       |
| BRCA1  | NTF3       |
| BRCA2  | SLIT2      |
| CCND2  | TERT       |
| CTNNB1 | TP53/TRP53 |
| IGF1R  |            |

2) Top Canonical Pathways

| Ingenuity Canonical Pathways                                              | B-H Adjusted p-value | Ratio        | Molecules                                       |
|---------------------------------------------------------------------------|----------------------|--------------|-------------------------------------------------|
| <b>Molecular Mechanisms of Cancer</b>                                     | <b>7.1E-07</b>       | <b>7/378</b> | <b>TP53,CCND2,APAF1,BMP7,BRCA1,CTNNB1,BMP10</b> |
| <b>p53 Signaling</b>                                                      | <b>7.1E-07</b>       | <b>5/96</b>  | <b>TP53,CCND2,APAF1,BRCA1,CTNNB1</b>            |
| <b>Basal Cell Carcinoma Signaling</b>                                     | <b>1.27E-05</b>      | <b>4/73</b>  | <b>TP53,BMP7,CTNNB1,BMP10</b>                   |
| <b>GADD45 Signaling</b>                                                   | <b>1.43E-05</b>      | <b>3/22</b>  | <b>TP53,CCND2,BRCA1</b>                         |
| <b>Role of NANOG in Mammalian Embryonic Stem Cell Pluripotency</b>        | <b>4.54E-05</b>      | <b>4/114</b> | <b>TP53,BMP7,CTNNB1,BMP10</b>                   |
| Ovarian Cancer Signaling                                                  | 7.16E-05             | 4/142        | TP53,BRCA2,BRCA1,CTNNB1                         |
| Human Embryonic Stem Cell Pluripotency                                    | 7.16E-05             | 4/156        | NTF3,BMP7,CTNNB1,BMP10                          |
| Thyroid Cancer Signaling                                                  | 7.22E-05             | 3/42         | TP53,NTF3,CTNNB1                                |
| Myc Mediated Apoptosis Signaling                                          | 1.98E-04             | 3/60         | TP53,IGF1R,APAF1                                |
| Role of BRCA1 in DNA Damage Response                                      | 1.98E-04             | 3/65         | TP53,BRCA2,BRCA1                                |
| Factors Promoting Cardiogenesis in Vertebrates                            | 5.49E-04             | 3/94         | BMP7,CTNNB1,BMP10                               |
| DNA Double-Strand Break Repair by Homologous Recombination                | 5.74E-04             | 2/17         | BRCA2,BRCA1                                     |
| Cardiomyocyte Differentiation via BMP Receptors                           | 8.89E-04             | 2/20         | BMP7,BMP10                                      |
| DNA damage-induced 14-3-3 $\sigma$ Signaling                              | 9.22E-04             | 2/21         | TP53,BRCA1                                      |
| Hereditary Breast Cancer Signaling                                        | 9.48E-04             | 3/128        | TP53,BRCA2,BRCA1                                |
| Aryl Hydrocarbon Receptor Signaling                                       | 1.52E-03             | 3/161        | TP53,CCND2,APAF1                                |
| Glioblastoma Multiforme Signaling                                         | 1.65E-03             | 3/164        | TP53,IGF1R,CTNNB1                               |
| Axonal Guidance Signaling                                                 | 2.61E-03             | 4/469        | NTF3,BMP7,SLIT2,BMP10                           |
| Role of PKR in Interferon Induction and Antiviral Response                | 3.07E-03             | 2/46         | TP53,APAF1                                      |
| Cell Cycle: G2/M DNA Damage Checkpoint Regulation                         | 3.37E-03             | 2/48         | TP53,BRCA1                                      |
| Role of Oct4 in Mammalian Embryonic Stem Cell Pluripotency                | 3.51E-03             | 2/45         | TP53,BRCA1                                      |
| Role of Osteoblasts, Osteoclasts and Chondrocytes in Rheumatoid Arthritis | 4.03E-03             | 3/238        | BMP7,CTNNB1,BMP10                               |
| Huntington's Disease Signaling                                            | 4.03E-03             | 3/240        | TP53,IGF1R,APAF1                                |
| Endometrial Cancer Signaling                                              | 4.1E-03              | 2/57         | TP53,CTNNB1                                     |
| Role of CHK Proteins in Cell Cycle                                        | 4.4E-03              | 2/57         | TP53,BRCA1                                      |

|                                            |          |       |              |
|--------------------------------------------|----------|-------|--------------|
| Checkpoint Control                         |          |       |              |
| Induction of Apoptosis by HIV1             | 4.69E-03 | 2/65  | TP53,APAF1   |
| ATM Signaling                              | 4.69E-03 | 2/61  | TP53,BRCA1   |
| Cell Cycle: G1/S Checkpoint Regulation     | 4.81E-03 | 2/66  | TP53,CCND2   |
| Estrogen-Dependent Breast Cancer Signaling | 4.81E-03 | 2/72  | TERT,IGF1R   |
| Small Cell Lung Cancer Signaling           | 6.05E-03 | 2/89  | TP53,APAF1   |
| BMP signaling pathway                      | 6.05E-03 | 2/80  | BMP7,BMP10   |
| Cyclins and Cell Cycle Regulation          | 7.04E-03 | 2/89  | TP53,CCND2   |
| Prostate Cancer Signaling                  | 7.31E-03 | 2/98  | TP53,CTNNB1  |
| TGF- $\beta$ Signaling                     | 7.31E-03 | 2/89  | INHA,BMP7    |
| Apoptosis Signaling                        | 7.97E-03 | 2/95  | TP53,APAF1   |
| Glioma Signaling                           | 8.76E-03 | 2/112 | TP53,IGF1R   |
| Mouse Embryonic Stem Cell Pluripotency     | 8.76E-03 | 2/99  | TP53,CTNNB1  |
| Amyotrophic Lateral Sclerosis Signaling    | 9.06E-03 | 2/117 | TP53,APAF1   |
| Telomerase Signaling                       | 9.19E-03 | 2/103 | TP53,TERT    |
| Pancreatic Adenocarcinoma Signaling        | 1.02E-02 | 2/120 | TP53,BRCA2   |
| PI3K/AKT Signaling                         | 1.31E-02 | 2/144 | TP53,CTNNB1  |
| Wnt/ $\beta$ -catenin Signaling            | 2.39E-02 | 2/174 | TP53,CTNNB1  |
| ILK Signaling                              | 2.74E-02 | 2/192 | KRT18,CTNNB1 |
| Colorectal Cancer Metastasis Signaling     | 4.22E-02 | 2/258 | TP53,CTNNB1  |

### 3) Function Table

| Category                             | Functions Annotation          | B-H Adjusted p-value | Molecules                                                 | Number of Molecules |
|--------------------------------------|-------------------------------|----------------------|-----------------------------------------------------------|---------------------|
| <b>Tumor QPCR IPA Function Table</b> |                               |                      |                                                           |                     |
| Cancer                               | gonadal tumor                 | 5.14E-07             | BMP7,BRCA1,BRCA2,CCND2,CTNNB1,INHA,KRT8,SLIT2,TP53        | 9                   |
|                                      | head and neck tumor           | 5.84E-07             | BRCA1,BRCA2,CCND2,CTNNB1,IGF1R,KRT18,SLIT2,TERT,TP53      | 9                   |
|                                      | hyperplasia                   | 1.23E-06             | APAF1,BRCA1,BRCA2,CCND2,CTNNB1,IGF1R,KRT8,TERT,TP53       | 9                   |
|                                      | mammary tumor                 | 1.61E-06             | BMP7,BRCA1,BRCA2,CTNNB1,IGF1R,KRT18,KRT8,SLIT2,TERT,TP53  | 10                  |
|                                      | genital tumor                 | 3.11E-06             | BMP7,BRCA1,BRCA2,CCND2,CTNNB1,IGF1R,INHA,KRT8,SLIT2,TP53  | 10                  |
|                                      | gastrointestinal tract cancer | 3.11E-06             | BMP7,BRCA1,BRCA2,CCND2,CTNNB1,IGF1R,KRT18,SLIT2,TERT,TP53 | 10                  |
|                                      | Ovarian Cancer and Tumors     | 3.11E-06             | BMP7,BRCA1,BRCA2,CTNNB1,INHA,KRT8,SLIT2,TP53              | 8                   |
|                                      | head and neck cancer          | 3.67E-06             | BRCA1,BRCA2,CTNNB1,IGF1R,KRT18,SLIT2,TERT,TP53            | 8                   |
|                                      | ovarian tumor                 | 3.87E-06             | BMP7,BRCA1,BRCA2,CTNNB1,INHA,KRT8,SLIT2,TP53              | 8                   |
|                                      | breast cancer                 | 9.34E-06             | BMP7,BRCA1,BRCA2,CTNNB1,IGF1R,KRT8,SLIT2,TERT,TP53        | 9                   |
|                                      | endocrine gland               | 1.31E-05             | BRCA1,BRCA2,CCND2,CTNNB1,IGF1R,INHA,TP53                  | 7                   |

|                                                |                                           |                 |                                                                                             |           |
|------------------------------------------------|-------------------------------------------|-----------------|---------------------------------------------------------------------------------------------|-----------|
|                                                | tumor                                     |                 |                                                                                             |           |
|                                                | ovarian cancer                            | 2.73E-05        | BMP7,BRCA1,BRCA2,CTNNB1,KRT8,SLIT2,TP53                                                     | 7         |
|                                                | benign neoplasia                          | 5.84E-05        | CCND2,CTNNB1,IGF1R,INHA,SLIT2,TERT,TP53                                                     | 7         |
|                                                | colorectal cancer                         | 8.47E-05        | BMP7,CCND2,CTNNB1,IGF1R,KRT18,SLIT2,TERT,TP53                                               | 8         |
|                                                | uterine cancer                            | 2.09E-04        | BRCA2,CTNNB1,IGF1R,KRT18,KRT8,TERT,TP53                                                     | 7         |
| Cardiovascular System Development and Function | development of cardiovascular system      | 8.37E-07        | BMP10,BMP7,BRCA1,CCND2,CTNNB1,IGF1R,NTF3,SLIT2,TERT,TP53                                    | 10        |
| Cell Cycle                                     | <b>cell cycle progression</b>             | <b>7.43E-10</b> | <b>APAF1,BMP7,BRCA1,BRCA2,CCND2,CTNNB1,IGF1R,INHA,KRT18,KRT8,NTF3,TERT,TP53</b>             | <b>13</b> |
|                                                | mitosis                                   | 5.30E-07        | APAF1,BMP7,BRCA1,BRCA2,IGF1R,KRT18,NTF3,TP53                                                | 8         |
|                                                | interphase of tumor cell lines            | 1.35E-06        | BMP7,BRCA1,CCND2,CTNNB1,IGF1R,TERT,TP53                                                     | 7         |
|                                                | G1 phase                                  | 2.93E-06        | BMP7,BRCA1,CCND2,CTNNB1,IGF1R,TERT,TP53                                                     | 7         |
| Cell Death and Survival                        | <b>apoptosis</b>                          | <b>1.61E-08</b> | <b>APAF1,BMP10,BMP7,BRCA1,BRCA2,CCND2,CTNNB1,IGF1R,INHA,KRT18,KRT8,NTF3,SLIT2,TERT,TP53</b> | <b>15</b> |
|                                                | necrosis                                  | 2.01E-07        | APAF1,BMP10,BMP7,BRCA1,BRCA2,CCND2,CTNNB1,IGF1R,INHA,KRT18,KRT8,NTF3,TERT,TP53              | 14        |
|                                                | cell death of connective tissue cells     | 4.13E-07        | APAF1,BRCA1,BRCA2,CTNNB1,IGF1R,KRT18,KRT8,TERT,TP53                                         | 9         |
|                                                | apoptosis of muscle cells                 | 4.13E-07        | BMP10,BMP7,BRCA2,CTNNB1,IGF1R,TERT,TP53                                                     | 7         |
|                                                | cell death of epithelial cells            | 4.41E-07        | APAF1,BMP7,CTNNB1,IGF1R,KRT18,KRT8,TERT,TP53                                                | 8         |
|                                                | cell death of fibroblast cell lines       | 5.14E-07        | APAF1,BRCA1,BRCA2,CTNNB1,KRT18,KRT8,TERT,TP53                                               | 8         |
|                                                | apoptosis of tumor cell lines             | 1.92E-06        | APAF1,BMP7,BRCA1,BRCA2,CTNNB1,IGF1R,KRT18,NTF3,TERT,TP53                                    | 10        |
|                                                | cell viability                            | 1.98E-05        | APAF1,BMP7,BRCA1,BRCA2,CTNNB1,IGF1R,NTF3,TERT,TP53                                          | 9         |
|                                                | cell viability of tumor cell lines        | 4.98E-05        | BRCA1,BRCA2,CTNNB1,IGF1R,NTF3,TERT,TP53                                                     | 7         |
| Cell Morphology                                | morphology of cells                       | 2.01E-07        | APAF1,BMP7,BRCA1,CCND2,CTNNB1,IGF1R,INHA,KRT18,KRT8,NTF3,TERT,TP53                          | 12        |
|                                                | abnormal morphology of cells              | 7.69E-06        | APAF1,BMP7,BRCA1,CCND2,IGF1R,INHA,KRT18,NTF3,TP53                                           | 9         |
| Cellular Assembly and Organization             | microtubule dynamics                      | 3.56E-04        | BMP7,CTNNB1,IGF1R,KRT18,NTF3,SLIT2,TP53                                                     | 7         |
| Cellular Development                           | proliferation of breast cancer cell lines | 2.34E-06        | BMP7,BRCA1,BRCA2,CCND2,IGF1R,TERT,TP53                                                      | 7         |
|                                                | proliferation of tumor cell lines         | 7.85E-06        | APAF1,BMP7,BRCA1,BRCA2,CCND2,CTNNB1,IGF1R,INHA,TERT,TP53                                    | 10        |
|                                                | differentiation of cells                  | 1.19E-05        | APAF1,BMP7,BRCA1,BRCA2,CTNNB1,IGF1R,INHA,KRT18,NTF3,TERT,TP53                               | 11        |
| Cellular Function and Maintenance              | cellular homeostasis                      | 2.80E-04        | APAF1,BRCA1,CTNNB1,IGF1R,KRT18,KRT8,NTF3,TP53                                               | 8         |
|                                                | microtubule dynamics                      | 3.56E-04        | BMP7,CTNNB1,IGF1R,KRT18,NTF3,SLIT2,TP53                                                     | 7         |
| Cellular Growth                                | proliferation of breast                   | 2.34E-06        | BMP7,BRCA1,BRCA2,CCND2,IGF1R,TERT,TP53                                                      | 7         |

|                                            |                                   |          |                                                                                |    |  |
|--------------------------------------------|-----------------------------------|----------|--------------------------------------------------------------------------------|----|--|
| and Proliferation                          | cancer cell lines                 |          |                                                                                |    |  |
|                                            | proliferation of epithelial cells | 2.58E-06 | BRCA1,CCND2,CTNNB1,IGF1R,INHA,TERT,TP53                                        | 7  |  |
|                                            | proliferation of cells            | 3.18E-06 | APAF1,BMP10,BMP7,BRCA1,BRCA2,CCND2,CTNNB1,IGF1R,INHA,KRT8,NTF3,SLIT2,TERT,TP53 | 14 |  |
|                                            | proliferation of tumor cell lines | 7.85E-06 | APAF1,BMP7,BRCA1,BRCA2,CCND2,CTNNB1,IGF1R,INHA,TERT,TP53                       | 10 |  |
| Cellular Movement                          | migration of cells                | 3.78E-05 | APAF1,BMP10,BMP7,BRCA1,CTNNB1,IGF1R,KRT8,NTF3,SLIT2,TP53                       | 10 |  |
| Developmental Disorder                     | Hypertrophy                       | 5.14E-07 | APAF1,BMP10,BMP7,CTNNB1,INHA,NTF3,TERT,TP53                                    | 8  |  |
|                                            | Hypoplasia                        | 9.30E-06 | BMP10,BMP7,BRCA2,CCND2,IGF1R,NTF3,TP53                                         | 7  |  |
| Digestive System Development and Function  | morphology of digestive system    | 1.96E-05 | APAF1,BMP7,BRCA1,INHA,KRT18,KRT8,TP53                                          | 7  |  |
| DNA Replication, Recombination, and Repair | synthesis of DNA                  | 1.22E-09 | BMP7,BRCA1,BRCA2,CCND2,CTNNB1,IGF1R,INHA,NTF3,TERT,TP53                        | 10 |  |
| Embryonic Development                      | development of brain              | 2.12E-09 | APAF1,BMP7,BRCA2,CCND2,CTNNB1,IGF1R,NTF3,SLIT2,TERT,TP53                       | 10 |  |
|                                            | development of genital organ      | 1.06E-05 | BMP7,BRCA1,BRCA2,CCND2,CTNNB1,INHA,TP53                                        | 7  |  |
| Endocrine System Disorders                 | Ovarian Cancer and Tumors         | 3.11E-06 | BMP7,BRCA1,BRCA2,CTNNB1,INHA,KRT8,SLIT2,TP53                                   | 8  |  |
|                                            | ovarian cancer                    | 2.73E-05 | BMP7,BRCA1,BRCA2,CTNNB1,KRT8,SLIT2,TP53                                        | 7  |  |
| Gastrointestinal Disease                   | gastrointestinal tract cancer     | 3.11E-06 | BMP7,BRCA1,BRCA2,CCND2,CTNNB1,IGF1R,KRT18,SLIT2,TERT,TP53                      | 10 |  |
|                                            | colorectal cancer                 | 8.47E-05 | BMP7,CCND2,CTNNB1,IGF1R,KRT18,SLIT2,TERT,TP53                                  | 8  |  |
| Gene Expression                            | transactivation                   | 2.56E-05 | BMP7,BRCA1,BRCA2,CCND2,CTNNB1,TERT,TP53                                        | 7  |  |
| Nervous System Development and Function    | development of brain              | 2.12E-09 | APAF1,BMP7,BRCA2,CCND2,CTNNB1,IGF1R,NTF3,SLIT2,TERT,TP53                       | 10 |  |
|                                            | morphology of nervous system      | 1.15E-04 | APAF1,BRCA1,CCND2,CTNNB1,IGF1R,NTF3,TP53                                       | 7  |  |
| Organ Development                          | development of brain              | 2.12E-09 | APAF1,BMP7,BRCA2,CCND2,CTNNB1,IGF1R,NTF3,SLIT2,TERT,TP53                       | 10 |  |
|                                            | development of genital organ      | 1.06E-05 | BMP7,BRCA1,BRCA2,CCND2,CTNNB1,INHA,TP53                                        | 7  |  |
| Organismal Development                     | development of brain              | 2.12E-09 | APAF1,BMP7,BRCA2,CCND2,CTNNB1,IGF1R,NTF3,SLIT2,TERT,TP53                       | 10 |  |
|                                            | development of genital organ      | 1.06E-05 | BMP7,BRCA1,BRCA2,CCND2,CTNNB1,INHA,TP53                                        | 7  |  |
|                                            | size of body                      | 2.48E-05 | BMP7,BRCA1,BRCA2,IGF1R,INHA,KRT8,NTF3,TP53                                     | 8  |  |
| Organismal Survival                        | organismal death                  | 1.87E-07 | APAF1,BMP10,BMP7,BRCA1,BRCA2,CCND2,CTNNB1,IGF1R,INHA,KRT8,NTF3,SLIT2,TERT,TP53 | 14 |  |
|                                            | survival of organism              | 4.66E-07 | BMP7,BRCA2,CCND2,CTNNB1,IGF1R,INHA,KRT18,NTF3,TP53                             | 9  |  |
|                                            | perinatal death                   | 3.42E-05 | APAF1,BMP7,BRCA1,IGF1R,NTF3,SLIT2,TP53                                         | 7  |  |
| Reproductive System Development            | morphology of reproductive system | 1.29E-06 | APAF1,BMP7,BRCA1,BRCA2,IGF1R,INHA,KRT8,TP53                                    | 8  |  |
|                                            | development of                    | 2.51E-06 | BMP7,BRCA1,BRCA2,CCND2,CTNNB1,IGF1R,INHA,                                      | 8  |  |

|                                   |                                                        |                      |                                                                                    |        |
|-----------------------------------|--------------------------------------------------------|----------------------|------------------------------------------------------------------------------------|--------|
| and Function                      | reproductive system<br>development of<br>genital organ | 1.06E-05             | TP53<br>BMP7,BRCA1,BRCA2,CCND2,CTNNB1,INHA,TP53                                    | 7      |
| Reproductive<br>System<br>Disease | gonadal tumor                                          | 5.14E-07             | BMP7,BRCA1,BRCA2,CCND2,CTNNB1,INHA,KRT8,<br>SLIT2,TP53                             | 9      |
|                                   | infertility                                            | 1.54E-06             | APAF1,BMP7,BRCA2,CCND2,INHA,KRT8,TP53                                              | 7      |
|                                   | genital tumor                                          | 3.11E-06             | BMP7,BRCA1,BRCA2,CCND2,CTNNB1,IGF1R,INHA,<br>KRT8,SLIT2,TP53                       | 10     |
|                                   | Ovarian Cancer and<br>Tumors                           | 3.11E-06             | BMP7,BRCA1,BRCA2,CTNNB1,INHA,KRT8,SLIT2,T<br>P53                                   | 8      |
|                                   | ovarian tumor                                          | 3.87E-06             | BMP7,BRCA1,BRCA2,CTNNB1,INHA,KRT8,SLIT2,T<br>P53                                   | 8      |
|                                   | ovarian cancer<br>uterine cancer                       | 2.73E-05<br>2.09E-04 | BMP7,BRCA1,BRCA2,CTNNB1,KRT8,SLIT2,TP53<br>BRCA2,CTNNB1,IGF1R,KRT18,KRT8,TERT,TP53 | 7<br>7 |
| Tissue<br>Development             | development of brain                                   | 2.12E-09             | APAF1,BMP7,BRCA2,CCND2,CTNNB1,IGF1R,NTF3,<br>SLIT2,TERT,TP53                       | 10     |
|                                   | development of<br>genital organ                        | 1.06E-05             | BMP7,BRCA1,BRCA2,CCND2,CTNNB1,INHA,TP53                                            | 7      |
| Tissue<br>Morphology              | morphology of<br>embryonic tissue                      | 2.36E-08             | APAF1,BMP10,BMP7,BRCA1,BRCA2,CTNNB1,KRT8<br>,NTF3,SLIT2,TP53                       | 10     |
|                                   | abnormal morphology<br>of embryonic tissue             | 2.48E-07             | APAF1,BMP7,BRCA1,BRCA2,CTNNB1,KRT8,NTF3,<br>SLIT2,TP53                             | 9      |
|                                   | quantity of cells                                      | 5.30E-07             | APAF1,BMP7,BRCA1,BRCA2,CCND2,CTNNB1,IGF1<br>R,INHA,KRT8,NTF3,TERT,TP53             | 12     |
